# Supplementary material
Source: publisher site journal article supplement (https://www.dovepress.com/article/571057)
Supplement: Supplementary file 1 [file 571057%20Revised%20supplementary.docx]

**Supplemental** **Table 1** Modified Observer’s Assessment of Alertness/Sedation (MOAA/S) score 35

| MOAA/S Score | Description | ASA continuum |
| --- | --- | --- |
| 5 | Responds readily to name spoken in normal tone (awake) | Minimal sedation |
| 4 | Lethargic response to name spoken in normal tone | Moderate sedation |
| 3 | Responds after name called loudly or repeatedly | Moderate sedation |
| 2 | Purposeful response to mild prodding or shaking | Moderate sedation |
| 1 | Responds to painful stimulus (trapezius squeeze) | Deep sedation |
| 0 | No response to painful stimulus (trapezius squeeze) | General anesthesia |

**Abbreviations:** ASA, American Society of Anesthesiologists.
